# 1 **Ca<sup>2+</sup>-activated sphingomyelin scrambling and turnover mediate ESCRT-independent**

## 2 **lysosomal repair**

3  
4 **Authors:** Patrick Niekamp<sup>1</sup>, Tolulope Sokoya<sup>1</sup>, Laura Vittadello<sup>2</sup>, Yongqiang Deng<sup>3</sup>, Yeongho Kim<sup>3</sup>, Angelika  
5 Hilderink<sup>1</sup>, Mirco Imlau<sup>2</sup>, Christopher J. Clarke<sup>4</sup>, Christopher G. Burd<sup>3</sup>, Joost C. M. Holthuis<sup>1\*</sup>

### 6 **Affiliations:**

7  
8 <sup>1</sup>Molecular Cell Biology Division, Department of Biology and Center of Cellular Nanoanalytics, University of  
9 Osnabrück, 49076 Osnabrück, Germany.

10 <sup>2</sup>Experimental Physics Division, Department of Physics and Center of Cellular Nanoanalytics, University of  
11 Osnabrück, 49076 Osnabrück, Germany.

12 <sup>3</sup>Department of Cell Biology, Yale School of Medicine, New Haven, CT 06520, USA.

13 <sup>4</sup>Department of Medicine and Cancer Center, Stony Brook University, Stony Brook, NY 11794, USA.

14  
15 \*Corresponding author: [holthuis@uos.de](mailto:holthuis@uos.de)

16  
17 **Abstract:** Lysosomes are vital organelles vulnerable to injuries from diverse materials. Failure to repair or sequester  
18 damaged lysosomes poses a threat to cell viability. Here we report that cells exploit a sphingomyelin-based  
19 lysosomal repair pathway that operates independently of ESCRT to reverse potentially lethal membrane damage.  
20 Various conditions perturbing organelle integrity trigger a rapid calcium-activated scrambling and cytosolic  
21 exposure of sphingomyelin. Subsequent metabolic conversion of sphingomyelin by neutral sphingomyelinases on  
22 the cytosolic surface of injured lysosomes promotes their repair, also when ESCRT function is compromised.  
23 Conversely, blocking turnover of cytosolic sphingomyelin renders cells more sensitive to lysosome-damaging drugs.  
24 Our data indicate that calcium-activated scramblases, sphingomyelin, and neutral sphingomyelinases are core  
25 components of a previously unrecognized membrane restoration pathway by which cells preserve the functional  
26 integrity of lysosomes.

29 Lysosomes are essential cellular organelles involved in the degradation of macromolecules, pathogen killing and  
30 metabolic signaling. To perform these vital tasks, lysosomes contain high concentrations of acid hydrolases, protons  
31 and calcium. Conversely, lysosomal damage caused by incoming pathogens, amphiphilic drugs or sharp crystals can  
32 have deleterious consequences, including cell death<sup>1</sup>. To avoid spilling of harmful lysosomal contents into the  
33 cytosol, injured lysosomes are marked for degradation by a specialized form of autophagy, known as lysophagy.  
34 This process is initiated by recruitment of cytosolic galectins and glycoprotein-specific ubiquitin ligases to  
35 abnormally exposed luminal glycans at the lesion site, resulting in engulfment of the damaged lysosome by  
36 autophagic membranes<sup>2,3</sup>. While lysophagy is a slow process in which the disrupted organelle is ultimately  
37 sacrificed, recent work revealed an important role of the Endosomal Sorting Complex Required for Transport  
38 (ESCRT) machinery in repairing small perforations in lysosomes to allow their escape from autophagic  
39 degradation<sup>4,5</sup>. ESCRT proteins are organized in functionally distinct complexes that drive an inverse membrane  
40 remodeling during various cellular processes, including cytokinetic abscission, vesicle biogenesis inside  
41 multivesicular endosomes, and viral budding, in addition to membrane repair<sup>6-8</sup>. All these processes require ESCRT-  
42 III proteins that form filaments within membrane invaginations and cooperate with the ATPase VSP4 to catalyze  
43 membrane constriction and fission away from the cytosol<sup>9</sup>.

44  
45 Activation of ESCRT enables cells to prevent potentially lethal consequences of minor perturbations in lysosomal  
46 integrity via a mechanism that seems to sense more subtle membrane injuries than galectins. However, the  
47 recruitment signal that triggers ESCRT-III assembly at sites of lysosomal damage has not been established with  
48 certainty. While detection of Ca<sup>2+</sup> leakage out of the injured lysosome by ALIX and its Ca<sup>2+</sup>-binding partner ALG2  
49 has been proposed as a mechanism<sup>4</sup>, other studies were unable to confirm a requirement for Ca<sup>2+</sup> and found that the  
50 ESCRT-I subunit TSG101 is more important than ALIX for mediating ESCRT-III recruitment in this context<sup>5,10</sup>.  
51 Thus, ESCRT assembly on damaged organelles may involve hitherto uncharacterized cues<sup>6</sup>.

52  
53 While glycans reside exclusively on the non-cytosolic surface of lysosomes and the plasma membrane, also certain  
54 lipids display strict asymmetric distributions across organellar bilayers. For instance, sphingomyelin (SM) is highly  
55 enriched in the exoplasmic leaflet of the plasma membrane whereas phosphatidylserine (PS) is primarily located in  
56 the cytosolic leaflet<sup>11-13</sup>. Translocation of PS to the outer leaflet during apoptosis marks dying cells and leads to their

57 timely removal<sup>14</sup>. Application of a GFP-tagged version of lysenin, a SM-specific toxin from the earthworm *Eisenia*  
58 *fetida*<sup>15</sup>, revealed that SM becomes exposed to the cytosol upon endomembrane damage caused by Gram-negative  
59 pathogens like *Shigella flexneri* or *Salmonella typhimurium*<sup>16</sup>. Breakout of these pathogens from the host vacuole  
60 into the cytosol follows a multi-step process, in which cytosolic SM exposure detected by the lysenin-based reporter  
61 invariably preceded glycan exposure, catastrophic membrane damage, and cytosolic entry of the bacteria. This  
62 raised the idea that the arrival of SM on the cytosolic surface of bacteria-containing vacuoles provides an early  
63 warning signal to alert cells of an imminent break down of organellar integrity<sup>16</sup>. How SM transfer across the bilayer  
64 of injured organelles is initiated and whether this process is part of a mechanism that helps preserve the integrity of  
65 cellular organelles remain to be explored.

66

## 67 **RESULTS**

### 68 **SM is readily exposed on the cytosolic surface of damaged organelles**

69 To study how membrane damage triggers transbilayer movement of SM, we used an engineered version of the SM-  
70 binding pore-forming toxin, equinatoxin II (Eq<sub>t</sub>). Expression of Eq<sub>t</sub>SM carrying a *N*-terminal signal sequence and  
71 *C*-terminal GFP tag previously enabled us to demonstrate sorting of native SM at the *trans*-Golgi network into a  
72 distinct class of secretory vesicles<sup>17</sup>. When expressed without signal sequence, Eq<sub>t</sub>SM displayed a diffuse  
73 distribution throughout the cytosol and nucleus of HeLa cells (Fig. 1A, 0 min time point). Occasionally, the  
74 cytosolic reporter gave rise to a few small intracellular puncta, which may originate from a minor tendency of Eq<sub>t</sub> to  
75 aggregate upon overexpression or SM exposure following spontaneous membrane damage. However, in cells treated  
76 with L-leucyl-L-leucine O-methyl ester (LLOMe), a lysosomotropic compound commonly used to disrupt lysosome  
77 integrity<sup>18</sup>, Eq<sub>t</sub>SM underwent a massive accumulation in numerous puncta distributed throughout the cell within  
78 minutes after drug addition (Fig. 1A, B). In contrast, LLOMe failed to trigger recruitment of a SM binding-deficient  
79 Eq<sub>t</sub> mutant, Eq<sub>t</sub>Sol. LLOMe-induced mobilization of Eq<sub>t</sub>SM was virtually abolished upon genetic ablation of the  
80 SM synthases SMS1 and SMS2 (SMS-KO; Fig. 1A, B; Fig. S1A). While SMS removal essentially abolished the  
81 cellular SM pool, it did not impair the ability of LLOMe to disrupt lysosomal integrity (Fig. S2). Collectively, these  
82 data indicate that Eq<sub>t</sub>SM faithfully reports cytosolic exposure of SM by LLOMe-damaged lysosomes.

83

84 To analyze the kinetics of EqtSM mobilization in relation to the degree of lysosomal damage, we next used cells co-  
85 expressing the SM reporter with mCherry-tagged Galectin-3 (Gal3), a cytosolic lectin with affinity for the complex  
86 glycans that reside on the non-cytosolic surface of lysosomes<sup>19</sup>. Upon LLOMe treatment, EqtSM readily  
87 accumulated in numerous puncta that also became gradually positive for Gal3 (Fig. 1C; Movie S1). Importantly,  
88 EqtSM was recruited to LLOMe-damaged lysosomes prior to Gal3, with a time difference of approximately 5 min  
89 (Fig. 1D). These findings are consistent with those reported by Ellison *et al.*<sup>16</sup> and indicate that a break in SM  
90 asymmetry is an early marker of lysosomal damage that precedes a catastrophic breakdown of membrane integrity,  
91 when galectins gain access to the luminal glycans. Live-cell imaging of RAW246.7 macrophages invaded by the  
92 bacterial pathogen *Mycobacterium marinum* revealed strong recruitment of EqtSM to a subset of bacteria at 1-2 h  
93 post-infection (Fig. 1E, F; Movie S2). No EqtSM recruitment was observed in macrophages invaded by the non-  
94 pathogenic *M. marinum* strain  $\Delta$ RD1, which fails to translocate to the cytosol and remains confined to the bacteria-  
95 containing phagosome due to a non-functional ESX-1 secretion system required for niche-breakage and pore-  
96 forming activity<sup>20,21</sup>.

97  
98 To further challenge a fundamental link between transbilayer SM movement and membrane damage, we next  
99 analysed the EqtSM distribution in cells exposed to distinct modes of plasma membrane-wounding. To this end, we  
100 first incubated cells expressing EqtSM with the bilayer-destabilizing compound digitonin. We observed a  
101 redistribution of the cytosolic SM reporter to discrete puncta at the plasma membrane within minutes after transient  
102 exposure to the compound (Fig. S3A). Similar results were obtained when cells were incubated with the pore-  
103 forming bacterial toxin streptolysin O (SLO; Fig. S3B). To couple localized plasma membrane injuries to a fast  
104 imaging of downstream events, we next conducted laser-based plasma membrane wounding using a confocal  
105 scanning microscope equipped with a pulsed-laser. This revealed an ultra-fast (within 5 sec) and localized  
106 mobilization of EqtSM, but not EqtSol, to the laser-induced wound site (Fig. 1G, H; Movie S3). While EqtSM is  
107 readily recruited to the damaged membrane area in both wildtype and SMS-KO cells, the signal in the latter readily  
108 faded. This is in line with our finding that SMS-KO cells contain only residual amounts of SM (Fig. S2A). Thus, a  
109 breach in membrane integrity caused by pore-forming chemicals, bacterial toxins or a laser appears to be tightly  
110 linked to a rapid transbilayer movement of SM.

111

112 **Damage triggers SM translocation through calcium-activated scramblases**

113 An influx of calcium from the extracellular environment or calcium-storing organelles has been recognized as a  
114 central trigger in the detection and repair of membrane injuries<sup>22,23</sup>. To address whether calcium plays a role in the  
115 damage-induced translocation of SM, we next analysed the distribution of cytosolic EqtSM in HeLa cells exposed to  
116 SLO in calcium-free medium supplemented with the calcium chelator EGTA. Removal of extracellular calcium  
117 greatly impaired SLO-induced formation of EqtSM-positive puncta (Fig. 2A, B). Moreover, treatment of cells with  
118 the calcium ionophore ionomycin triggered an accumulation of EqtSM in numerous puncta, but only when calcium  
119 was present in the medium (Fig. 2C, D). The plasma membrane of mammalian cells harbors a calcium-activated  
120 phospholipid scramblase, TMEM16F, which catalyzes phosphatidylserine (PS) externalization in response to  
121 elevated intracellular calcium<sup>24</sup>. We therefore wondered whether TMEM16F plays a role in SM scrambling at sites  
122 of plasma membrane damage. Strikingly, genetic ablation of TMEM16F abolished the calcium-dependent formation  
123 of EqtSM-positive puncta in both SLO- and ionomycin-treated cells (Fig. 2A-D, Fig. S4). This indicates that  
124 TMEM16F is responsible for damage-induced SM movement across the plasma membrane.

125  
126 Because lysosomes store calcium and rupturing them increases intracellular calcium, we next asked whether EqtSM  
127 recruitment to damaged lysosomes is similarly controlled by calcium-activated scramblases. Preloading cells with  
128 the lysosomal calcium chelator BAPTA-AM significantly impaired recruitment of the cytosolic SM reporter to  
129 LLOMe-injured lysosomes (Fig. 2E, F). In contrast, removal of TMEM16F did not affect the drug-induced  
130 lysosomal mobilization of the reporter (Fig. 2E, G). Based on these results, we conclude that the transbilayer  
131 movement of SM in response to membrane injuries is a calcium-dependent process, involving TMEM16F at the  
132 plasma membrane and presumably a related scramblase in lysosomes (Fig. 2H). The identity of the lysosomal  
133 scramblase remains to be established.

134

135 **SM-deficient cells are defective in lysosomal repair**

136 We next investigated whether SM actively participates in the mechanism by which cells detect and repair damaged  
137 lysosomes. To this end, we took advantage of the ability of lysosomes to retain LysoTracker, a weak base that  
138 accumulates in the organelle's acidic lumen and is fluorescent at low pH<sup>25</sup>. LysoTracker fluorescence is lost upon  
139 brief exposure of cells to the lysosomotropic compound glycyl-L-phenylalanine 2-naphthylamide (GPN) but returns

140 after GPN is washed away (Fig. 3A, B). Like LLOMe, GPN induces a transient disruption of lysosomal integrity  
141 that is accompanied by an accumulation of EqtSM in numerous puncta (Fig. 3B, C; Movie S4). However, GPN is  
142 processed into metabolites thought to promote osmotic rupture<sup>26</sup>. As lysosomal pH critically relies on the structural  
143 integrity of the membrane, the loss and recovery of LysoTracker fluorescence in cells transiently exposed to GPN is  
144 consistent with lysosomal membrane disruption and restoration. Wildtype and SMS-KO cells acquired LysoTracker  
145 to a similar extent (Fig. S5), and also lost LysoTracker fluorescence with similar kinetics after addition of GPN (Fig.  
146 3D, E), indicating comparable lysosome function. However, recovery of LysoTracker fluorescence after GPN  
147 removal was significantly delayed in the SMS-KO cells. Moreover, less LysoTracker-positive structures recovered  
148 in SMS-KO cells than in wildtype. In SMS-KO cells transduced with SMS1 under control of a doxycycline-  
149 inducible promoter, addition of doxycycline restored the capacity to produce SM (Fig. S1) and regain LysoTracker  
150 fluorescence to the same level as in wildtype cells after GPN is washed away (Fig. 3F, G). SMS removal also caused  
151 a significant rise in cell death in the presence of LLOMe (Fig. 3H). Collectively, this indicates that SM plays a  
152 critical role in the recovery of lysosomes from acute, potentially lethal damage.

153

#### 154 **SM is dispensable for ESCRT recruitment to damaged lysosomes**

155 Previous work revealed that the ESCRT machinery is readily recruited to damaged lysosomes and participates in  
156 their repair<sup>4,5</sup>. As ESCRT recruitment is at least partially dependent on a rise in intracellular calcium<sup>4</sup>, we wondered  
157 whether cytosolic SM exposure may be part of the mechanism by which ESCRT is mobilized to injured lysosomes.  
158 To address this idea, we first monitored the subcellular distribution of both EqtSM and CHMP4B, an ESCRT-III  
159 component necessary for all known mammalian ESCRT functions<sup>6</sup>, in LLOMe-treated cells. This revealed that  
160 mobilization of EqtSM to LLOMe-damaged lysosomes precedes CHMP4B recruitment with a time gap of about 60  
161 seconds (Fig. 4A, B; Movie S5). We then asked whether SM is required for mobilizing this central ESCRT-III  
162 component. However, the rate and efficiency by which CHMP4B accumulated on LLOMe-damaged lysosomes in  
163 SMS-KO cells were indistinguishable from those in wildtype cells (Fig. 4C, D). On the other hand, SMS-KO cells  
164 displayed a prolonged CHMP4B retention on damaged lysosomes, a finding consistent with a critical role of SM in  
165 lysosomal repair. Moreover, siRNA-mediated depletion of ALIX and TSG101, two proteins essential for ESCRT-III  
166 recruitment to damaged lysosomes<sup>5</sup>, further reduced the viability of LLOMe-treated SMS-KO cells while having

167 only a minor impact on the survival of LLOMe-treated controls (Fig. 3I, J; Fig. S6). This indicates that cells are  
168 equipped with a SM-dependent lysosomal repair pathway that operates in parallel with the ESCRT pathway.

169

### 170 **Hydrolysis of cytosolic SM enhances lysosomal repair in ESCRT-compromised cells**

171 To investigate whether SM exposure on the cytosolic surface of damaged lysosomes is critical for their repair, we  
172 generated a construct in which a SMase from *Bacillus cereus* was fused to the cytosolic tail of the lysosome-  
173 associated membrane protein LAMP1 (Fig. 5A). The LAMP1-bSMase fusion protein co-localized with LAMP1-  
174 positive lysosomes and catalyzed the metabolic conversion of fluorescent NBD-SM into NBD-ceramide (Fig. S7).  
175 LAMP1 fused to a catalytically inactive bSMase mutant (D322A/H323A) served as control. Live cell imaging  
176 revealed that expression of active LAMP1-bSMase, but not its enzyme-dead counterpart, efficiently suppressed  
177 mobilization of cytosolic EqtSM to LLOMe-damaged lysosomes (Fig. 5B, C; Movies S6 and S7), indicating that the  
178 active fusion protein catalyzes a rapid and efficient hydrolysis of SM on the cytosolic surface of damaged  
179 lysosomes. To address whether metabolic turnover of cytosolic SM reduces or enhances the repair of damaged  
180 lysosomes, we next analyzed the impact of active or enzyme-dead LAMP1-bSMase on the ability of cells to regain  
181 LysoTracker fluorescence after transient exposure to GPN. We found that expression of active LAMP1-bSMase  
182 enhanced rather than diminished the recovery of LysoTracker fluorescence in GPN-treated cells (Fig. 5D). This  
183 effect became even more prominent when these experiments were carried out on cells treated with ALIX and  
184 TSG101-targeting siRNAs (Fig. 5E). Thus, a calcium-induced exposure and subsequent metabolic turnover of SM  
185 on the cytosolic surface of damaged lysosomes promotes their repair, even when ESCRT recruitment is blocked.

186

### 187 **Inhibition of neutral SMases disrupts lysosomal repair**

188 As ectopic expression of a bacterial SMase targeted to the cytosolic surface of lysosomes enhanced lysosomal  
189 repair, we anticipated that inhibition of endogenous neutral SMases, which act on cytosolic SM pools, might perturb  
190 lysosomal repair. Indeed, addition of the generic neutral SMase inhibitor GW4869 significantly impaired the  
191 recovery of LysoTracker fluorescence in cells transiently exposed to GPN (Fig. 6A). The negative impact of  
192 GW4869 on lysosomal repair was even more pronounced in cells in which ESCRT function was compromised by  
193 pre-treatment with ALIX and TSG101-targeting siRNAs (Fig. 6B). Consistent with a critical role of neutral SMases  
194 in lysosomal repair, GW4869 significantly reduced the viability of both control and ALIX/TSG101-depleted cells in

195 the presence of LLOMe (Fig. 6C, D). This raised the question which of the known neutral SMase isoforms  
196 participates in the restoration of damaged lysosomes. Four mammalian neutral SMases have been identified to date,  
197 namely nSMase-1 (SMPD2), nSMase-2 (SMPD3), nSMase-3 (SMPD4) and mitochondria-associated MA-nSMase  
198 (SMPD5)<sup>27</sup>. While expression of nSMase-3 is mainly restricted to skeletal muscle and heart<sup>28</sup>, nSMase-1 and -2 are  
199 ubiquitously expressed and promote SM hydrolysis on the cytosolic surface of the ER and plasma membrane,  
200 respectively<sup>29,30</sup>. Using the LysoTracking fluorescence recovery assay, we found that siRNA-mediated  
201 depletion of nSMase-1 had no impact on the repair of GPN-damaged lysosomes in ESCRT-compromised cells (Fig.  
202 6E). In contrast, siRNA-mediated depletion of nSMase-2 significantly impaired the recovery of lysosomes injured  
203 by GPN (Fig. 6F; Fig. S8). This indicates that nSMase-2 is a critical component of a SM-dependent membrane  
204 repair pathway for the restoration of damaged lysosomes.

205

## 206 **DISCUSSION**

207 The ESCRT machinery plays a well-established role in responding to and repairing damaged lysosomes. Here, we  
208 uncovered a complementary sphingolipid-operated lysosomal repair pathway that reverses potentially lethal  
209 membrane damage inflicted by lysosomotropic peptides and restores compartmental pH independently of ESCRT.  
210 The main features of this membrane repair pathway are depicted in Fig. 6G. We envision that minor perturbations in  
211 the integrity of the lysosomal membrane cause calcium ions to leak from the organelle's lumen into the cytosol. A  
212 local rise in cytosolic calcium triggers calcium-activated scramblases near the injury site, resulting in a rapid  
213 exposure of SM on the cytosolic surface of the damaged organelle. The expanding pool of SM in the cytosolic  
214 leaflet is then turned-over by a neutral SMase, presumably nSMase-2, which cleaves the bulky phosphorylcholine  
215 head group of SM to generate ceramide, a lipid with a much smaller and less-hydrated head group. Ceramide has a  
216 cone-shaped structure and occupies a smaller membrane area than SM. Ceramides released by SM turnover self-  
217 assemble into microdomains that possess a negative spontaneous curvature<sup>31</sup>, causing a local condensation of the  
218 cytosolic leaflet. This, in turn, would promote an inverse budding of the bilayer away from the cytosol, akin to the  
219 ESCRT-mediated formation of intraluminal vesicles<sup>32</sup>. Collectively, our data indicate that a calcium-induced SM  
220 scrambling and turnover drives an ESCRT-independent mechanism to clear minor lesions from the lysosome-  
221 limiting membrane and prevent lysosomal damage-induced cell death. In line with our findings, ceramide-based  
222 membrane invaginations were demonstrated in SM-containing giant liposomes exposed to external SMases<sup>33,34</sup> and



223 have been implicated in the biogenesis of proteolipid-containing exosomes inside multivesicular endosomes, a  
224 process occurring independently of ESCRT and with nSMase-2 playing a crucial role<sup>35,36</sup>.  
225  
226 Lysosomal acid SMase (aSMase) previously emerged as a key player in the repair of plasma membrane damage  
227 caused by pore-forming toxins. Thus, aSMase has been shown to promote plasma membrane invagination and  
228 endocytosis in SLO-permeabilized cells in response to Ca<sup>2+</sup>-triggered exocytosis of lysosomes<sup>37</sup>. Here, removal of  
229 SLO-damaged plasma membrane areas relies on ceramide microdomain formation in the exoplasmic leaflet through  
230 aSMase-mediated hydrolysis of SM, which is normally concentrated there. While this process is mediated by a  
231 classical budding of the bilayer toward the cytosol, there is also evidence for alternative plasma membrane repair  
232 pathways in which lesions are removed by a reverse budding and shedding of extracellular vesicles. For instance,  
233 real-time imaging and correlative scanning electron microscopy of cells wounded by a laser provided evidence for  
234 ESCRT-mediated extracellular shedding of the damaged plasma membrane area<sup>7</sup>. Moreover, recent work revealed  
235 that TMEM16F promotes plasma membrane repair in cells exposed to pore-forming toxins by facilitating the release  
236 of extracellular vesicles to eliminate the toxin from the membrane<sup>38</sup>. This raised the idea that PS exposure catalyzed  
237 by TMEM16F helps protect cells from external attacks and injuries by constituting a “repair me” signal. However,  
238 our present findings raise an alternative scenario in which an injury-induced scrambling of SM mediated by  
239 TMEM16F serves to fuel a sphingolipid-based membrane restoration pathway analogous to the one that operates in  
240 lysosomes. Thus, the striking SM asymmetry that marks late secretory and endolysosomal organelles may actually  
241 reflect a vital role of SM and neutral SMases in safeguarding the functional integrity of these organelles.  
242

243 **ONLINE METHODS**

244 **Chemical reagents**

245 Chemical reagents were used at the following concentrations, unless indicated otherwise: 1 mM LLOMe (Bachem;  
246 4000725); 200  $\mu$ M GPN (Abcam; ab145914); 1500 U/ml SLO (Sigma-Aldrich; S5265); 250  $\mu$ M digitonin (Sigma-  
247 Aldrich; D141); 5  $\mu$ M ionomycin (Sigma-Aldrich; I0634); 100  $\mu$ M BAPTA-AM (Cayman Chemical; 15551); 75  
248 nM LysoTracker<sup>TM</sup> Red DND-99 (Thermo Fisher Scientific; L7528); 1  $\mu$ g/ml doxycycline (Sigma-Aldrich); and 10  
249  $\mu$ M GW4869 (Sigma-Aldrich; D1692). GW4869 was stored at -80°C as a 2 mM stock suspension in dimethyl  
250 sulfoxide (DMSO). Just before use, the suspension was solubilized by addition of 5% methane sulfonic acid as  
251 described in (39).

252

253 ***Antibodies***

254 Antibodies used were: rabbit polyclonal anti-TMEM16F (Sigma-Aldrich; HPA038958; IB 1:1000); mouse  
255 monoclonal anti-SMS2 (Santa Cruz; sc-293384; IB 1:1000); rabbit polyclonal anti-CHMP4B (Proteintech; 13683-1-  
256 AP; IF 1:300); mouse monoclonal anti-ALIX (Biolegend; 634501; IB 1:1000); mouse monoclonal anti-Actin  
257 (Sigma-Aldrich; A1978; IF 1:1200; IB 1:10,000); rabbit monoclonal anti-Na/K-ATPase (Abcam; ab-76020; IF  
258 1:600); mouse monoclonal anti-TSG101 (Santa Cruz; sc-7964; IB 1:1000); mouse monoclonal anti-V5 (Invitrogen;  
259 r96025; IF 1:400; IB 1:1000); HRP-conjugated goat anti-mouse IgG (Thermo Fisher Scientific; 31430; IB 1:5000);  
260 Cy<sup>TM</sup>2-conjugated donkey anti-mouse IgG (Jackson ImmunoResearch Laboratories; 715-225-150; IF 1:400); and  
261 Cyanine Cy<sup>TM</sup>3-conjugated donkey anti-rabbit IgG (Jackson ImmunoResearch Laboratories; 715-165-152; IF  
262 1:400).

263

264 **DNA constructs**

265 Expression constructs encoding cytoplasmic GFP-tagged EqtSM and EqtSol were created by PCR amplification of  
266 DNA encoding residues 22-227 of Eqt-SM or Eqt-Sol<sup>40</sup> followed by cloning into EcoRI and BamHI sites of pN1-  
267 oxGFP<sup>17</sup>. Expression constructs encoding cytoplasmic mKate-tagged EqtSM and EqtSol were created by PCR  
268 amplification followed by cloning into NheI and AgeI sites of mKate-LifeAct-7 (Addgene #54697), thereby  
269 replacing the LifeAct ORF. Expression constructs encoding mCherry-tagged human Galactin3 (pLX304-mCherry-  
270 hGalactin3), GFP-tagged human LAMP1 (pCMV-hLAMP1-GFP) and mCherry-tagged human LAMP1 (pCMV-

271 hLAMP1-mCherry) were kindly provided by Michael Hensel (University of Osnabrück, DE) and have been  
272 described in (41,42). Expression constructs encoding bacterial SMase fused to GFP-tagged LAMP1 were created by  
273 PCR amplification of DNA encoding residues 28-333 of *Bacillus cereus* SMase using pEF6-bSMase-V5-His and  
274 pEF6-bSMase<sup>D322A/H323A</sup>-V5-His<sup>43</sup> as templates, followed by cloning into BamHI and AgeI sites of pCMV-  
275 hLAMP1-GFP to yield LAMP1-bSMase-V5-GFP and LAMP1-bSMase<sup>dead</sup>-V5-GFP. Expression construct pEF6-  
276 nSMase2-V5 encoding V5-tagged human neutral SMase2 has been described in (44). A doxycycline-inducible  
277 expression construct encoding human SMS1 with a *N*-terminal FLAG tag (MDYKDDDDK) was created by PCR  
278 amplification using pcDNA1.3-SMS1-V5<sup>45</sup> as a template, followed by cloning into BamHI and NotI sites of  
279 pENTR<sup>TM</sup>11 (Invitrogen; A10467). The insert was next transferred into lentiviral expression vector *pInducer20*  
280 (Addgene #44012) using Gateway cloning, according to the manufacturer's instructions.

281

#### 282 **Cell culture and siRNA treatment**

283 Human cervical carcinoma HeLa (ATCC CCL-2) and human embryonic kidney HEK293T cells (ATCC CRL-3216)  
284 were cultured in Dulbecco's modified Eagle's medium (DMEM) supplemented with 10% FBS (Pan Biotech; P40-  
285 47500). Murine RAW264.7 macrophages (ATCC TIB-71) were cultured in RPMI supplemented with 10% FBS. A  
286 HeLa cell-line stably expressing CHMP4B-eGFP was kindly provided by Anthony Hyman (Max Planck Institute for  
287 Molecular Cell Biology and Genetics, Dresden, DE) and has been described in<sup>46</sup>. DNA transfections were performed  
288 using Lipofectamine 3000 (Thermo Fisher). Treatment with siRNAs (Qiagen) were carried out using  
289 Oligofectamine reagent (Invitrogen) according to the manufacturer's instructions. siRNA target sequences were:  
290 GFP, 5'-GCACCATCTTCTTCAAGGACG-3'; ALIX, 5'-CCUGGAUAAUGAUGAAGGA-3'; TSG101, 5'-  
291 CCUCCAGUCUUCUCUCGUC-3'; nSMase1, 5'-CAGCAGAGAGGUCGCCGUU-3'; nSMase2, 5'-  
292 CAAGCGAGCAGCCACCAAA-3'.

293

#### 294 **RT-qPCR**

295 To verify siRNA-mediated knock-down of gene expression, RNA was extracted from siRNA-treated cells using  
296 TRIzol reagent (Thermo Fisher Scientific). One µg of RNA was used to synthesize cDNA with the Superscript III  
297 Reverse Transcriptase Kit (Thermo Fisher Scientific; 18080051) according to the manufacturer's instructions.  
298 Quantitative PCR reactions were performed on a C1000 Thermal Cycler with a CFX96 Real-Time System (Bio-

299 Rad) using Maxima™ SYBR™ Green/ROX 2x qPCR Master Mix (Thermo Fisher Scientific; K0221). Each  
300 reaction contained 400 ng of cDNA and 0.3 μM each of sense and anti-sense primers in a total volume of 10 ul.  
301 Initial denaturation was at 95°C for 10 min. Cycles (n = 40) consisted of 10 s denaturation at 95°C, 30 s annealing at  
302 57°C and 30 s extension at 72°C. Analysis of a single PCR product was confirmed by melt-curve analysis. All  
303 reactions were performed in triplicate. Expression data were normalized using actin as a reference. Ct values were  
304 converted to mean normalized expression using the  $2^{-\Delta\Delta Ct}$  method (Livak and Schmittgen, Methods, 2001). Primers  
305 used were: nSMase1-sense, 5'-GGTGCTCAACGCCTATGTG-3'; nSMase1-antisense, 5'-  
306 CGTCTGCCTTCTTGGATGTG-3'; nSMase2-sense, 5'-CAACAAGTGTAACGACGATGCC-3'; nSMase2-  
307 antisense, 5'-CGATTCTTTGGTCTGAGGTGT-3'; actin-sense, 5'-ATTGGCAATGAGCGGTTCC-3'; actin-  
308 antisense, 5'-GGTAGTTTCGTGGATGCCACA-3'.

309

#### 310 **Generation of TMEM16F-KO cells**

311 To knock out TMEM16F in HeLa cells, a mix of CRISPR/Cas9 constructs encoding three different TMEM16F-  
312 specific gRNAs and a GFP marker was obtained from Santa Cruz (sc-402736). The TMEM16F specific gRNA  
313 sequences were: A/sense, 5'-CAGCCTTTGGTACACTCAAC-3'; B/sense, 5'- GAATCTAACCTTATCTGTCA-3';  
314 C/sense, 5'- AATAGTACTCACAACTCCG-3'. At 24 h post-transfection, GFP-positive single cells were sorted  
315 into 96 well plates using a SH800 Cell Sorter (Sony Biotechnology), expanded and analyzed for TMEM16F  
316 expression by immunoblot analysis. In addition, loss of TMEM16F function was verified by analyzing ionomycin-  
317 treated cells for surface exposure of phosphatidylserine using Annexin V staining. To this end, wild type and  
318 TMEM16F-KO HeLa cells were detached using trypsin, taken up in DMEM containing 10% FBS, washed in PBS  
319 and resuspended in Annexin V Binding Buffer (Biolegend, no. 422201) and then incubated in the presence or  
320 absence of 15 μM ionomycin for 10 min at 37°C in 5% CO<sub>2</sub>. Next, APC-Annexin V (Biolegend, no. 640920; 5 μl in  
321 100 μl Binding Buffer) and propidium iodide (5 μg/ml; Sigma Aldrich, no. P4170) were added and cells were  
322 incubated for 10 min at RT. After addition of 400 μl Annexin V Binding Buffer, cells were cooled on ice and then  
323 subjected to flow cytometry using a SH800 Cell Sorter (Sony Biotechnology).

324

325 **Generation of SMS-KO cells**

326 To generate SMS1 and SMS2 double-KO (SMS-KO) HeLa cells, a mix of CRISPR/Cas9 constructs encoding three  
327 different gRNA per gene and the corresponding HDR plasmids were obtained from Santa Cruz (SMS1, sc-403382;  
328 SMS2, sc-405416). SMS1-specific gRNA sequences were: A/sense, 5'- TG ATACCACCAGAGTCGCCG-3';  
329 B/sense, 5'- TTGTACCTCGATCTTACCAT-3'; C/sense, 5'- TAAGTGTTAGCATGACCGTG-3'. SMS2-specific  
330 gRNA sequences were: A/sense, 5'-TAACCGTGTGACCGCTGAAG-3'; B/sense, 5'-  
331 GGTCTTGATAAGTGTTTCGT-3'; C/sense, 5'-GTTACTACTCTACCTGTGCC-3'. Cells transfected with the  
332 SMS2-KO constructs were grown in medium containing 2 µg/ml puromycin at 48 h post-transfection (Sigma-  
333 Alderich; P8833). After 1-2 weeks, single drug-resistant colonies were picked, expanded and analysed for SMS2  
334 expression by immunoblot analysis using a mouse monoclonal anti-SMS2 antibody. A SMS1/2 double-KO cell line  
335 (clone #7) was created by transfecting SMS2-KO clone #25 with SMS1-KO constructs as above, after ejection of  
336 the puromycin selectable marker using Cre vector (Santa Cruz; sc-418923) according to the manufacturer's  
337 instructions. Loss of SMS1 was confirmed by metabolic labeling of double-KO candidates with 4 µM of the  
338 clickable sphingosine (2*S*, 3*R*, 4*E*)-2-Amino-octadec-4-en-17-yne-1,3-diol (clickSph) in Opti-MEM (Fisher  
339 Scientific Scientific; 11520386) for 24 h. The synthesis of clickSph will be described elsewhere (S. Korneev and J.  
340 Holthuis, unpublished data). Next, cells were washed in PBS, harvested, and subjected to Bligh and Dyer lipid  
341 extraction (Bligh and Dyer, 1959). Dried lipid films were click reacted with the fluorogenic dye 3-azido-7-  
342 hydroxycoumarin (Jena Bioscience; CLK-FA047) by addition of 64.5 µl of a freshly prepared click reaction mix  
343 containing 0.45 mM 3-azido-7-hydroxycoumarin and 1.4 mM Cu(I)tetra(acetonitrile) tetrafluoroborate in  
344 CH<sub>3</sub>CN:EtOH (3:7, v:v) for 2.5 h at 45°C without shaking. The reaction was quenched by addition of 150 µl  
345 methanol, dried down in a Speed-Vac, dissolved in CHCl<sub>3</sub>:methanol (2:1, v:v), and applied at 120 nl/s on a NANO-  
346 ADAMANT HP-TLC plate (Macherey-Nagel, Germany) with a CAMAG Linomat 5 TLC sampler (CAMAG;  
347 Switzerland). The TLC plate was developed in CHCl<sub>3</sub>:MeOH:H<sub>2</sub>O:AcOH (65:25:4:1, v:v:v:v) using a CAMAG  
348 ADC2 automatic TLC developer (CAMAG; Switzerland). Fluorescent lipids were analyzed using a ChemiDoc  
349 XRS+ with UV-transillumination and Image Lab Software (BioRad, USA).

350

351 **Lentiviral transduction**

352 HeLa SMS-KO cells with a stably integrated doxycycline-inducible SMS1 expression construct were created by  
353 lentiviral transduction. To this end, HEK293T cells were co-transfected with *pInducer20*-FLAG-SMS1 and the  
354 packaging vectors psPAX2 (Addgene #12260) and pMD2.G (Addgene #12259). Culture medium was changed 6 h  
355 post-transfection. After 48 h, the lentivirus-containing medium was harvested, passed through a 0.45  $\mu$ m filter,  
356 mixed 1:1 (v/v) with DMEM containing 8  $\mu$ g/ml polybrene (Sigma-Aldrich; TR-1003) and used to infect HeLa  
357 SMS-KO cells. At 24 h post-infection, the medium was replaced with DMEM containing 1 mg/ml G418 (Sigma-  
358 Aldrich; G8168) and selective medium was changed daily. After 3-5 days, positively transduced cells were selected  
359 and analyzed for doxycycline-dependent expression of FLAG-SMS1 by immunoblot analysis, immunofluorescence  
360 microscopy, and metabolic labeling with clickSph as described above.

361

362 **SMase activity assay**

363 HeLa cells were seeded in a 6-well plate at 150,000 cells per well in DMEM supplemented with 10% FBS. After 24  
364 h, cells were transfected with nSMase2-V5, LAMP1-bSMase-V5-GFP or LAMP1-bSMase<sup>dead</sup>-V5-GFP and grown  
365 for 24 h. Next, cells were harvested in ice-cold lysis buffer (25 mM Tris pH 7.4, 0.1 mM PMSF, 1x protease  
366 inhibitor cocktail), subjected to sonication (Branson Ultrasonic Sonifier) and centrifuged at 500 g for 10 min at 4°C  
367 to obtain a post-nuclear fraction. Aliquots equivalent to 20  $\mu$ g of total protein were included in a 100  $\mu$ l reaction  
368 mixture containing 50 mM Tris pH 7.4, 10 mM MgCl<sub>2</sub>, 0.2% Triton X-100, 10 mM DTT, 50  $\mu$ M phosphatidylserine  
369 (Sigma-Aldrich; P7769) and 50  $\mu$ M C<sub>6</sub>-NBD-SM (Biotium; 60031). Reactions were incubated at 37°C for 2 h,  
370 terminated by addition of MeOH/CHCl<sub>3</sub>, subjected to a Bligh and Dyer lipid extraction and then analyzed by TLC as  
371 described above.

372

373 **Cytotoxicity assay**

374 Cells treated with siRNAs were seeded in a 96-well plate (Greiner Bio-One; 655101) at 10,000 cells per well in  
375 DMEM supplemented with 10% FBS at 24 h after starting the treatment. After 24 h, the medium was replaced with  
376 Opti-MEM, and 24 h later LLOMe was added at the indicated concentration. After 3.5 h, PrestoBlue HS (Thermo  
377 Fisher Scientific; P50200) was added directly to the well to a final concentration of 10% (v/v) and incubated for 1.5  
378 h at 37°C. Next, absorbance at 570 nm was measured with 600 nm as reference wavelength using an Infinite 200 Pro

379 M-Plex plate reader (Tecan Lifesciences). To calculate relative percentage of survival, the measured value for each  
380 well (x) was subtracted by the minimum measured value (min) and divided by the subtrahend of the average  
381 measured value of untreated cells (untreated) and the minimum measured value (min);  $((x-\text{min})-(\text{untreated}-\text{min}))$ . To  
382 analyse the impact of GW4869 on LLOMe sensitivity, cells were seeded in a 96-well plate as above and grown for  
383 48 h. Next, cells were treated with 10  $\mu\text{M}$  GW4869 or 0.5% DMSO (vehicle control) for 30 min before LLOMe was  
384 added at the indicated concentration. Cell viability was assessed as described above.

385

### 386 **Time-lapse recording of laser wounding**

387 Laser wounding and time-lapse acquisition were performed using an Olympus model FV3000 laser scanning  
388 microscope (Olympus Europa SE & CO. KG) optically coupled to a fs laser system that comprises a regeneratively  
389 amplified fs laser (Pharos-HE-20; Light Conversion Inc.) and an optical parametric amplifier (OPA, Orpheus-Twins  
390 F; Light Conversion Inc.). The fs-pulses are adjusted collinear to the optical path of the continuous laser integrated  
391 in the microscope, enabling the simultaneous use of the continuous and pulsed laser as pumping source. Prior to the  
392 coupling into the microscope, neutral density filters can be inserted to tailor the average power and so the energy per  
393 pulse. The filter combination for simultaneous IR and blue emission was BP 488/730-1200. The wavelength of the  
394 pulsed laser was set at 900 nm, the repetition rate was 10 kHz, and the pulse duration was 180 fs, with a total  
395 exposure time of 3 sec. The average power at the sample position was 900  $\mu\text{W}$ , which implies that an energy per  
396 pulse of 90 nJ was achieved. For time-lapse recording of laser wounding, an UPLSAPO 60x water immersed NA 1.2  
397 objective with a custom infrared (IR) coating was used. Based on the diffraction limited spot created by the  
398 objective, the photodamaged area was estimated to be approximately 500 nm. For laser wounding experiments,  
399 HeLa cells were seeded on 24 mm glass coverslips in a 6-well plate at a density of 150.000 cells per well in DMEM  
400 containing 10% FBS. After 24 h, the medium was replaced with Opti-MEM and cells were transfected with EqtSM-  
401 GFP or EqtSol-GFP. After 24 h, Opti-MEM was replaced with Imaging Medium (IM; 30 mM HEPES, 140 mM  
402 NaCl, 2.5 mM KCl, 1 mM MgCl<sub>2</sub>, 1.8 mM CaCl<sub>2</sub>, 10 mM D-glucose, pH7.4.) and cells were transferred to the  
403 microscope. Time-lapse images were acquired every 5 sec before and after laser wounding (5 z-sections, 1  $\mu\text{m}$   
404 apart).

405

## 406 **Time-lapse recordings of cells exposed to organelle-damaging agents**

407 Time-lapse recordings of cells exposed to organelle-damaging drugs or pathogens were performed using a Zeiss Cell  
408 Observer Spinning Disc Confocal Microscope equipped with a TempModule S1 temperature control unit, a  
409 Yokogawa Spinning Disc CSU-X1a 5000 Unit, a Evolve EMCCD camera (Photonics, Tucson), a motorized xyz-  
410 stage PZ-2000 XYZ (Applied Scientific Instrumentation) and an Alpha Plan-Apochromat x 63 (NA 1.46) oil  
411 immersion objective. The following filter combinations were used: blue emission with BP 445/50, green emission  
412 with BP 525/50, orange emission BP 605/70. All images were acquired using Zeiss Zen 2012 acquisition software.  
413 At 48 h before imaging, cells were seeded into a  $\mu$ -Slide 8 well glass bottom chamber (Ibidi; 80827) at a density of  
414 20.000 cells per well in DMEM supplemented with 10% FBS. After 24 h, the medium was replaced with Opti-MEM  
415 and cells were transfected with expression constructs encoding fluorescently-tagged proteins. After another 24 h,  
416 Opti-MEM was replaced with IM containing 30 mM HEPES, 140 mM NaCl, 2.5 mM KCl, 1 mM MgCl<sub>2</sub>, 1.8 mM  
417 CaCl<sub>2</sub> and 10 mM D-glucose, pH7.4. Next, cells were immediately transferred to the stage-top incubator preheated  
418 to 37°C. The slide was allowed to equilibrate for 10 min before initiation of image acquisition. For experiments  
419 under Ca<sup>2+</sup>-depleted conditions, CaCl<sub>2</sub>-free IM was used, which was supplemented with either 2 mM EGTA or 100  
420  $\mu$ M BAPTA-AM. Time-lapse images were acquired every 10-30 sec (6 z-sections, 1  $\mu$ m apart). After 2 min,  
421 organelle-damaging agents were added directly to the well without pausing image acquisition.

422

## 423 ***M. marinum* infection**

424 RAW264.7 cells were seeded into a SensoPlate™ 96-Well Glass-Bottom Plate (Greiner Bio-One; M4187) at a  
425 density of 10.000 cells per well in RPMI supplemented with 10% FBS. After 24 h, cells were transfected with  
426 EqtSM-GFP or EqtSol-GFP. At 24 h post-transfection, cells were infected with *M. marinum* wildtype or  $\Delta$ RD1  
427 mutant strains constitutively expressing mCherry at an MOI of 10. Strains were kindly provided by Caroline Barisch  
428 (University of Osnabrück) and have been described in<sup>47</sup>. The 96-well plate was centrifuged at 1250 g for 30 sec and  
429 then incubated for 2 h at 37°C. Next, cells were washed with PBS and fixed with 4% (w/v) paraformaldehyde (PFA)  
430 in PBS for 15 min at RT. For time-lapse imaging, cells were grown in phenol red-free RPMI medium supplemented  
431 with 30 mM HEPES and infected with the above *M. marinum* strains at an MOI of 25. After centrifugation of the  
432 96-well plate at 1250 g for 30 secs, cells were imaged using the Zeiss Cell Observer SD microscope set-up with  
433 images captured at 1 min time intervals (5 z-sections, 1  $\mu$ m apart).



434 **Immunostaining of fixed cells**

435 For treatment with digitonin, cells were seeded onto 12 mm glass coverslips at a density of 40.000 cells per  
436 coverslip in DMEM supplemented with 10% FBS. After 24 h, the medium was replaced with Opti-MEM and cells  
437 were transfected with EqtSM-GFP. After 48 h, cells were treated with 250  $\mu$ M digitonin for 1 min, washed twice in  
438 Opti-MEM, incubated in Opti-MEM for 3 min at 37°C and then fixed with 4% (w/v) PFA in PBS for 15 min at RT.  
439 After quenching in 50 mM ammonium chloride, cells were permeabilized using PBS containing 0.1% (w/v) saponin  
440 and 0.2% (w/v) BSA and immunostained for Na/K-ATPase and counterstained with DAPI. For monitoring  
441 recruitment of endogenous CHMP4B to LLOMe-damaged lysosomes, cells were seeded onto 12 mm glass  
442 coverslips at a density of 40.000 cells per coverslip in DMEM supplemented with 10% FBS. After 24 h, the medium  
443 was replaced with Opti-MEM. At 48 h post-seeding, cells were incubated with Opti-MEM containing 1 mM  
444 LLOMe for the indicated time period, washed with PBS, and then fixed with MeOH at -20°C for 15 min. After  
445 fixation, cells were washed three times with PBS and permeabilized in PBS containing 0.3% (v/v) Triton-X100 and  
446 1% (w/v) BSA for 15 min. Cells were immunostained for CHMP4B and actin, and counterstained with DAPI.

447

448 **Time-lapse recordings of LysoTracker-labeled cells**

449 At 72 h before imaging, cells were treated with siRNAs as indicated. At 48 h before imaging, cells were seeded in a  
450  $\mu$ -Slide 8 well glass bottom chamber (Ibidi; 80827) at a density of 20.000 cells per well in DMEM supplemented  
451 with 10% FBS. After 24 h, the medium was replaced with Opti-MEM and cells were transfected with expression  
452 constructs encoding fluorescently-tagged proteins as indicated. At 24 h post-transfection, Opti-MEM was replaced  
453 by IM containing 75 nM LysoTracker (LT) and the cells were immediately transferred to a stage-top incubator  
454 preheated to 37°C. The slide was allowed to equilibrate for 10 min before initiation of image acquisition with the  
455 Zeiss Cell Observer SD microscope. Time-lapse images were acquired every 30 sec (6 z-sections, 1  $\mu$ m apart). After  
456 4.5 mins of image acquisition, GPN was directly added into the well to a final concentration of 200  $\mu$ M without  
457 pausing the acquisition. After 2 min of GPN exposure, acquisition was paused for 2 min to aspirate the GPN-  
458 containing medium, wash the cells once with LT-containing IM and add fresh LT-containing IM before acquisition  
459 was resumed. To analyse the impact of GW4869 on the recovery of LysoTracker fluorescence after transient GPN  
460 exposure, cells were seeded in a  $\mu$ -Slide 8 well glass bottom chamber, subjected to medium changes as above and  
461 incubated for 48 h. Next, the cells were treated with 10  $\mu$ M GW4869 or 0.5% DMSO (vehicle control) for 10 min in

462 IM without LT and subsequently for 10 min in IM containing 75 nM LT. The GW4869 and DMSO concentrations  
463 were kept constant during and after the 2-min GPN exposure and images were acquired every 30 sec as described  
464 above.

465

#### 466 **Image analysis**

467 All image analyses were performed using Image J macros on the original, unmodified data. Only cells that  
468 maintained a healthy morphology were included into the analysis. To quantify the number of EqtSM, Gal3 or  
469 CHMP4B-positive puncta during time-lapse imaging, the background was subtracted to remove noise and a manual  
470 threshold was set to exclusively include puncta above the signal of the cytosolic probe in untreated cells. Puncta  
471 with close proximity were separated using the watershed function. Next, for each time point, all puncta with pre-  
472 determined characteristics were counted automatically (size 0.2-5  $\mu\text{m}^2$ , circularity 0.5-1). For cells co-expressing  
473 CHMP4B-eGFP and EqtSM-mKate, the nuclear area was excluded from the analysis. For normalization, the number  
474 of puncta for each time point was divided by the total measured area to account for size difference of cells and then  
475 multiplied by 100 to obtain the number of puncta per 100  $\mu\text{m}^2$  cell area. For normalization relative to the maximal  
476 value, the maximum number of puncta for each cell was determined and each time point was divided by the  
477 maximum value. To quantify the intensity of EqtSM-positive puncta upon laser damage, the images were first  
478 corrected for bleaching. Next, an ROI at the site of damage was selected and after a fixed threshold was  
479 implemented with the “Minimum” setting, the relative intensity in the ROI was measured for each time point. For  
480 quantifying LT-positive puncta, the background was subtracted to remove noise and an automatic threshold was set  
481 for  $t = 0$  min. Puncta with close proximity were separated using the watershed function. Next, for each time point,  
482 all puncta with pre-determined characteristics were counted automatically (size 0.2-5  $\mu\text{m}^2$ , circularity 0.5-1). For  
483 quantification, the average of the first five time points (0 - 2min) was calculated and every time point was divided by  
484 the average. To quantify the LT accumulation efficiency, the background was subtracted to remove noise and an  
485 automatic threshold was set for  $t = 10$  min. Puncta with close proximity were separated and for each time point,  
486 puncta with pre-determined characteristics were counted automatically (size 0.2-5  $\mu\text{m}^2$ , circularity 0.5-1). For  
487 quantification, the average for the time points from  $t = 8$  to  $t = 10$  min was calculated and every time point was  
488 divided by the average. To quantify the intensity of the CHMP4B immunostaining in LLOMe-treated cells, the cell  
489 outline marked by actin immunostaining was used to measure the cell area. For the CHMP4B immunostaining, a

490 pre-determined, fixed threshold was applied and the intensity above the threshold was measured. The intensity  
491 above threshold was divided by the cell area. The average value for 10 min LLOMe treatment was set to 1 and all  
492 data points were divided by the average value. Each individual measurement was plotted in a violin plot.

### 493 **Image J Macros**

#### 494 **Quantification LysoTracker puncta**

```
495     1. run("Subtract...", "value=10 stack");  
496     2. setAutoThreshold("Default dark no-reset");  
497     3. setOption("BlackBackground", false);  
498     4. run("Convert to Mask", "method=Default background=Dark");  
499     5. run("Convert to Mask", "method=Default background=Light");  
500     6. run("Watershed", "stack");  
501     7. run("Analyze Particles...", "size=0.2-5 circularity=0.5-1.00 show=Outlines display exclude summarize  
502         stack");  
503     8. run("Next Slice [>]");  
504     9. // repeat step 7 and 8 until all time frames have been quantified
```

505

#### 506 **CHMP4B recruitment / Pre-processing**

```
507     1. imageTitle=getTitle();  
508     2. run("Split Channels");  
509     3. selectWindow("C1-"+imageTitle);  
510     4. rename("DAPI");  
511     5. selectWindow("C2-"+imageTitle);  
512     6. rename("Actin");  
513     7. selectWindow("C3-"+imageTitle);  
514     8. rename("CHMP4B");  
515     9. run("Merge Channels...", "c2=[Actin] c1=[CHMP4B] c3=[DAPI] create");  
516    10. run("Z Project...", "projection=[Max Intensity]");
```

```
517     11. run("Split Channels");
518     12. selectWindow("C1-MAX_Composite");
519     13. setMinAndMax(200, 2000);
520     14. run("Subtract...", "value=10");
521     15. selectWindow("C2-MAX_Composite");
522     16. setMinAndMax(450, 2200);
523     17. run("Subtract...", "value=50");
524     18. selectWindow("C3-MAX_Composite");
525     19. setMinAndMax(400, 700);
526     20. run("Merge Channels...", "c1=[C1-MAX_Composite] c2=[C2-MAX_Composite] c3=[C3-
527         MAX_Composite] create");
528     21. selectWindow("Composite");
529     22. close();
```

530

#### 531 **CHMP4B recruitment / Quantification**

```
532     1. //setTool("freehand");
533     2. run("Measure");
534     3. run("Duplicate...", "duplicate");
535     4. run("Split Channels");
536     5. close();
537     6. selectWindow("C1-MAX_Composite-1")
538     7. setAutoThreshold("Default dark no-reset");
539     8. //run("Threshold...");
540     9. setThreshold(1400, 65535);
541    10. run("Convert to Mask");
542    11. run("Measure");
543    12. selectWindow("C2-MAX_Composite-1");
544    13. close();
```

545

546 **Quantification EqtSM-GFP and mCherry-Galectin3 puncta**

- 547 1. //set Threshold manually
- 548 2. setOption("BlackBackground", false);
- 549 3. run("Convert to Mask", "method=Default background=Dark");
- 550 4. run("Fill Holes", "stack");
- 551 5. run("Watershed", "stack");
- 552 6. run("Analyze Particles...", "size=0.2-5 circularity=0.50-1.00 show=Outlines display exclude summarize
- 553 stack");
- 554 7. run("Next Slice [>]")
- 555 8. //Repeat step 6 and 7 until all time points are analyzed

556

557 **Quantification CHMP4B-GFP and EqtSM-mKate recruitment**

- 558 1. //perform bleach correction with “exponential fit”
- 559 2. //select region that excludes nucleus
- 560 3. setOption("BlackBackground", false);
- 561 4. run("Convert to Mask", "method=Default background=Dark");
- 562 5. run("Fill Holes", "stack");
- 563 6. run("Analyze Particles...", "size=0.2-5 circularity=0.0-1.00 show=Outlines display exclude summarize
- 564 stack");
- 565 7. run("Next Slice [>]")
- 566 8. //Repeat step 6 and 7 until all time points are analyzed

567

568       **Acknowledgments:** We gratefully acknowledge Caroline Barisch, Michael Hensel, Anthony Hyman, and Yussuf  
569       Hannun for providing DNA constructs, cell lines and bacterial strains, and Rainer Kurre for technical support in live  
570       cell microscopy.

571

572       **Funding:** This work was supported by the Deutsche Forschungsgemeinschaft (project SFB944-P14 and HO3539/1-  
573       1 to J. C. M. H. and INST 901/179 to M. I.) as well as by the National Institute of General Medical Sciences of the  
574       United States National Institutes of Health (award R01GM095766 to C. G. B.).

575

576       **Author contributions:** P. N. and J. C. M. H. designed the research and wrote the manuscript; P. N. performed the  
577       experiments and analyzed the results; T. S. and A. H. generated and analyzed the SMS-KO, TMEM16F-KO,  
578       and *pInd*-SMS1 cell lines; L. V. and M. I. assisted with 2-photon laser damage; Y. D., Y. K. and C. G. B. designed  
579       and characterized the equinatoxin probes; C. J. C. provided intellectual expertise and helped to interpret  
580       experimental results; All authors discussed results and commented on the manuscript.

581

582       **Competing interests:** Authors declare no competing interests.

583

584       **Data and materials availability:** All data is available in the main text or Supplementary Materials.

585

586       **REFERENCES**

- 587       1.       Kroemer, G. & Jäättelä, M. Lysosomes and autophagy in cell death control. *Nat. Rev. Cancer* **5**, 886–897  
588               (2005).
- 589       2.       Thurston, T. L. M., Wandel, M. P., Von Muhlinen, N., Foeglein, Á. & Randow, F. Galectin 8 targets  
590               damaged vesicles for autophagy to defend cells against bacterial invasion. *Nature* **482**, 414–418 (2012).
- 591       3.       Chauhan, S. *et al.* TRIMs and Galectins Globally Cooperate and TRIM16 and Galectin-3 Co-direct  
592               Autophagy in Endomembrane Damage Homeostasis. *Dev. Cell* **39**, 13–27 (2016).
- 593       4.       Skowyra, M. L., Schlesinger, P. H., Naismith, T. V & Hanson, P. I. Triggered recruitment of ESCRT  
594               machinery promotes endolysosomal repair. *Science*. **360**, eaar507 (2018).
- 595       5.       Radulovic, M. *et al.* ESCRT-mediated lysosome repair precedes lysophagy and promotes cell survival.  
596               *EMBO J.* **37**, 1–15 (2018)
- 597       6.       Vietri, M., Radulovic, M. & Stenmark, H. The many functions of ESCRTs. *Nat. Rev. Mol. Cell Biol.* **21**, 25–  
598               42 (2020).
- 599       7.       Jimenez, A. J., Maiuri, P., Lafaurie-janvore, J., Divoux, S. & Piel, M. ESCRT Machinery Is Required for  
600               Plasma Membrane Repair. *Science*. **343**, 1247136 (2014).
- 601       8.       Scheffer, L. L. *et al.* Mechanism of Ca<sup>2+</sup>-triggered ESCRT assembly and regulation of cell membrane  
602               repair. *Nat. Commun.* **5**, 5646 (2014).
- 603       9.       Pfitzner, A.-K. *et al.* An ESCRT-III Polymerization Sequence Drives Membrane Deformation and Fission.  
604               *Cell* **182**, 1140-1155.e18 (2020).
- 605       10.      López-Jiménez, A. T. *et al.* The ESCRT and autophagy machineries cooperate to repair ESX-1-dependent  
606               damage at the Mycobacterium-containing vacuole but have opposite impact on containing the infection.  
607               *PLOS Pathog.* **14**, e1007501 (2018).
- 608       11.      Bretscher, M. S. Membrane Structure: Some General Principles. *Science*. **181**, 622–629 (1973).
- 609       12.      Verkleij, A. . *et al.* The asymmetric distribution of phospholipids in the human red cell membrane. A  
610               combined study using phospholipases and freeze-etch electron microscopy. *Biochim. Biophys. Acta -*  
611               *Biomembr.* **323**, 178–193 (1973).
- 612       13.      Devaux, P. F. Static and dynamic lipid asymmetry in cell membranes. *Biochemistry* **30**, 1163–1173 (1991).
- 613       14.      Segawa, K. & Nagata, S. An Apoptotic ‘Eat Me’ Signal: Phosphatidylserine Exposure. *Trends Cell Biol.* **25**,

- 614 639–650 (2015).
- 615 15. Yamaji, A. *et al.* Lysenin, a Novel Sphingomyelin-specific Binding Protein. *J. Biol. Chem.* **273**, 5300–5306  
616 (1998).
- 617 16. Ellison, C. J., Kukulski, W., Boyle, K. B., Munro, S. & Randow, F. Transbilayer Movement of  
618 Sphingomyelin Precedes Catastrophic Breakage of Enterobacteria-Containing Vacuoles. *Curr. Biol.* **30**,  
619 2974–2983.e6 (2020).
- 620 17. Deng, Y., Rivera-Molina, F. E., Toomre, D. K. & Burd, C. G. Sphingomyelin is sorted at the trans Golgi  
621 network into a distinct class of secretory vesicle. *Proc. Natl. Acad. Sci.* **113**, 6677–6682 (2016).
- 622 18. Repnik, U. *et al.* L-leucyl-L-leucine methyl ester does not release cysteine cathepsins to the cytosol but  
623 inactivates them in transiently permeabilized lysosomes. *J. Cell Sci.* **130**, 3124–3140 (2017).
- 624 19. Johannes, L., Jacob, R. & Leffler, H. Galectins at a glance. *J. Cell Sci.* **131**, jcs208884 (2018).
- 625 20. van der Wel, N. *et al.* M. tuberculosis and M. leprae Translocate from the Phagolysosome to the Cytosol in  
626 Myeloid Cells. *Cell* **129**, 1287–1298 (2007).
- 627 21. Houben, D. *et al.* ESX-1-mediated translocation to the cytosol controls virulence of mycobacteria. *Cell.*  
628 *Microbiol.* **14**, 1287–1298 (2012).
- 629 22. Steinhardt, R., Bi, G. & Alderton, J. Cell membrane resealing by a vesicular mechanism similar to  
630 neurotransmitter release. *Science.* **263**, 390–393 (1994).
- 631 23. Cooper, S. T. & McNeil, P. L. Membrane repair: Mechanisms and pathophysiology. *Physiol. Rev.* **95**, 1205–  
632 1240 (2015).
- 633 24. Suzuki, J., Umeda, M., Sims, P. J. & Nagata, S. Calcium-dependent phospholipid scrambling by  
634 TMEM16F. *Nature* **468**, 834–840 (2010).
- 635 25. Chazotte, B. Labeling Lysosomes in Live Cells with LysoTracker. *Cold Spring Harb. Protoc.* **2011**,  
636 pdb.prot5571 (2011).
- 637 26. Jadot, M., Colmant, C., Wattiaux-De Coninck, S. & Wattiaux, R. Intralysosomal hydrolysis of glycyl-L-  
638 phenylalanine 2-naphthylamide. *Biochem. J.* **219**, 965–70 (1984).
- 639 27. Airola, M. V & Hannun, Y. A. Sphingolipid Metabolism and Neutral Sphingomyelinases. *Handb. Exp.*  
640 *Pharmacol.* **215**, 57–76 (2013).
- 641 28. Moylan, J. S. *et al.* Neutral sphingomyelinase-3 mediates TNF-stimulated oxidant activity in skeletal



- 642 muscle. *Redox Biol.* **2**, 910–920 (2014).
- 643 29. Tomiuk, S., Zumbansen, M. & Stoffel, W. Characterization and Subcellular Localization of Murine and  
644 Human Magnesium-dependent Neutral Sphingomyelinase. *J. Biol. Chem.* **275**, 5710–5717 (2000).
- 645 30. Milhas, D., Clarke, C. J., Idkowiak-Baldys, J., Canals, D. & Hannun, Y. A. Anterograde and retrograde  
646 transport of neutral sphingomyelinase-2 between the Golgi and the plasma membrane. *Biochim. Biophys.*  
647 *Acta - Mol. Cell Biol. Lipids* **1801**, 1361–1374 (2010).
- 648 31. Alonso, A. & Goñi, F. M. The Physical Properties of Ceramides in Membranes. *Annu. Rev. Biophys.* **47**,  
649 633–654 (2018).
- 650 32. Katzmann, D. J., Babst, M. & Emr, S. D. Ubiquitin-dependent sorting into the multivesicular body pathway  
651 requires the function of a conserved endosomal protein sorting complex, ESCRT-I. *Cell* **106**, 145–155  
652 (2001).
- 653 33. Holopainen, J. M., Angelova, M. I. & Kinnunen, P. K. J. Vectorial budding of vesicles by asymmetrical  
654 enzymatic formation of ceramide in giant liposomes. *Biophys. J.* **78**, 830–838 (2000).
- 655 34. Nurminen, T. A., Holopainen, J. M., Zhao, H. & Kinnunen, P. K. J. Observation of topical catalysis by  
656 sphingomyelinase coupled to microspheres. *J. Am. Chem. Soc.* **124**, 12129–12134 (2002).
- 657 35. Trajkovic, K. *et al.* Ceramide triggers budding of exosome vesicles into multivesicular endosomes. *Science*  
658 **319**, 1244–1247 (2008).
- 659 36. Guo, B. B., Bellingham, S. A. & Hill, A. F. The neutral sphingomyelinase pathway regulates packaging of  
660 the prion protein into exosomes. *J. Biol. Chem.* **290**, 3455–3467 (2015).
- 661 37. Tam, C. *et al.* Exocytosis of acid sphingomyelinase by wounded cells promotes endocytosis and plasma  
662 membrane repair. **189**, 1027–1038 (2010).
- 663 38. Wu, N. *et al.* Critical Role of Lipid Scramblase TMEM16F in Phosphatidylserine Exposure and Repair of  
664 Plasma Membrane after Pore Formation. *Cell Rep.* **30**, 1129-1140.e5 (2020).
- 665 39. Luberto, C. *et al.* Inhibition of tumor necrosis factor-induced cell death in MCF7 by a novel inhibitor of  
666 neutral sphingomyelinase. *J. Biol. Chem.* **277**, 41128–41139 (2002).
- 667 40. Costantini, L. M. *et al.* A palette of fluorescent proteins optimized for diverse cellular environments. *Nat.*  
668 *Commun.* **6**, 7670 (2015).
- 669 41. Röder, J. & Hensel, M. Presence of SopE and mode of infection result in increased Salmonella-containing

- 670 vacuole damage and cytosolic release during host cell infection by *Salmonella enterica*. *Cell. Microbiol.* **22**,  
671 1–17 (2020).
- 672 42. Göser, V., Kehl, A., Röder, J. & Hensel, M. Role of the ESCRT-III complex in controlling integrity of the  
673 *Salmonella*-containing vacuole. *Cell. Microbiol.* **22**, 1–20 (2020).
- 674 43. Sakamoto, W. *et al.* Probing compartment-specific sphingolipids with targeted bacterial sphingomyelinases  
675 and ceramidases. *J. Lipid Res.* **60**, 1841–1850 (2019).
- 676 44. Clarke, C. J., Cloessner, E. A., Roddy, P. L. & Hannun, Y. A. Neutral sphingomyelinase 2 (nSMase2) is the  
677 primary neutral sphingomyelinase isoform activated by tumour necrosis factor- $\alpha$  in MCF-7 cells. *Biochem.*  
678 *J.* **435**, 381–390 (2011).
- 679 45. Huitema, K., Van Den Dikkenberg, J., Brouwers, J. F. H. M. & Holthuis, J. C. M. Identification of a family  
680 of animal sphingomyelin synthases. *EMBO J.* **23**, 33–44 (2004).
- 681 46. Poser, I. *et al.* BAC TransgeneOmics: a high-throughput method for exploration of protein function in  
682 mammals. *Nat. Methods* **5**, 409–415 (2008).
- 683 47. Hanna, N. *et al.* Zn<sup>2+</sup> Intoxication of *Mycobacterium marinum* during *Dictyostelium discoideum* Infection  
684 Is Counteracted by Induction of the Pathogen Zn<sup>2+</sup> Exporter CtpC. *MBio* **12**, 1–15 (2021).
- 685
- 686

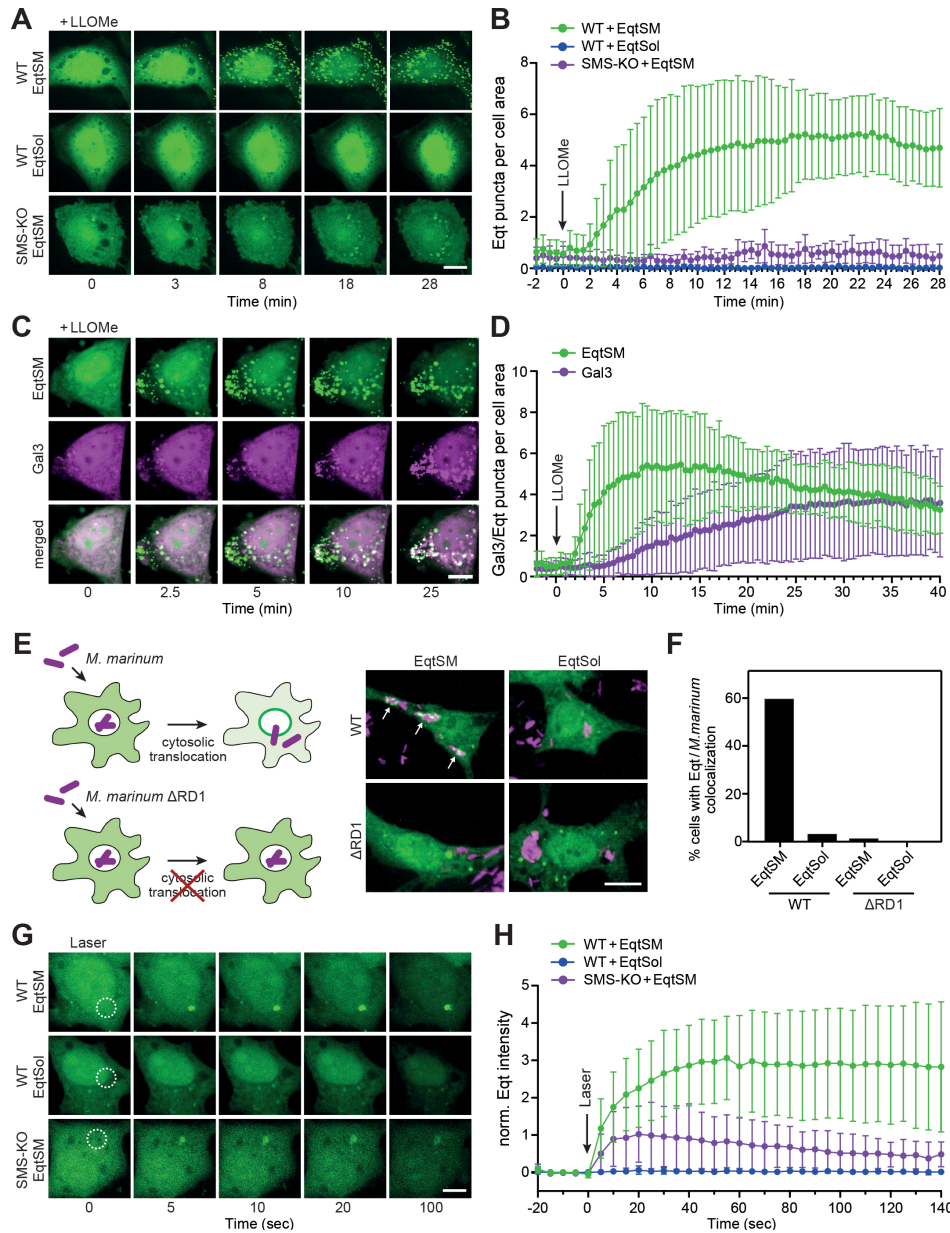

**Fig. 1. Cytosolic EqtSM readily binds organelles injured by chemicals, pathogens or light.**

(A) Time-lapse fluorescence images of wildtype (WT) or SMS-KO HeLa cells expressing GFP-tagged EqtSM or EqtSol and treated with 1 mM LLOMe for the indicated time. (B) Time-course plotting Eqt-positive puncta per 100  $\mu\text{m}^2$  cell area in cells treated as in (A). Data are means  $\pm$  SD from  $\geq 8$  cells per condition. (C) Time-lapse fluorescence images of wildtype HeLa cells co-expressing GFP-tagged EqtSM (green) and mCherry-tagged Gal3 (magenta) treated with 1 mM LLOMe for the indicated time. (D) Time-course plotting Eqt- and Gal3-positive puncta per 100  $\mu\text{m}^2$  cell area in cells treated as in (C). Data are means  $\pm$  SD from  $\geq 17$  cells per condition. (E) RAW264.7 cells expressing GFP-tagged EqtSM or EqtSol (green) were infected with mCherry-expressing wildtype (WT) or translocation-defective ( $\Delta$ RD1) mutant strains of *Mycobacterium marinum* (magenta). Live-cell fluorescence micrographs were captured 2 h post-infection. (F) Percentage of cells treated as in (E) showing colocalization of mCherry-expressing *M. marinum* and EqtSM-positive puncta. Data are means from  $\geq 30$  cells per condition. (G) Time-lapse fluorescence images of wildtype (WT) or SMS-KO HeLa cells expressing GFP-tagged EqtSM or EqtSol and locally wounded by a brief pulse from a 2-photon laser. (H) Time-course plotting Eqt-associated fluorescence at the laser-induced wound site in cells treated as in (G). Data are means  $\pm$  SD from  $\geq 5$  cells per condition. Scale bar, 10  $\mu\text{m}$ .

687  
688  
689  
690  
691  
692  
693  
694  
695  
696  
697  
698  
699  
700  
701  
702  
703

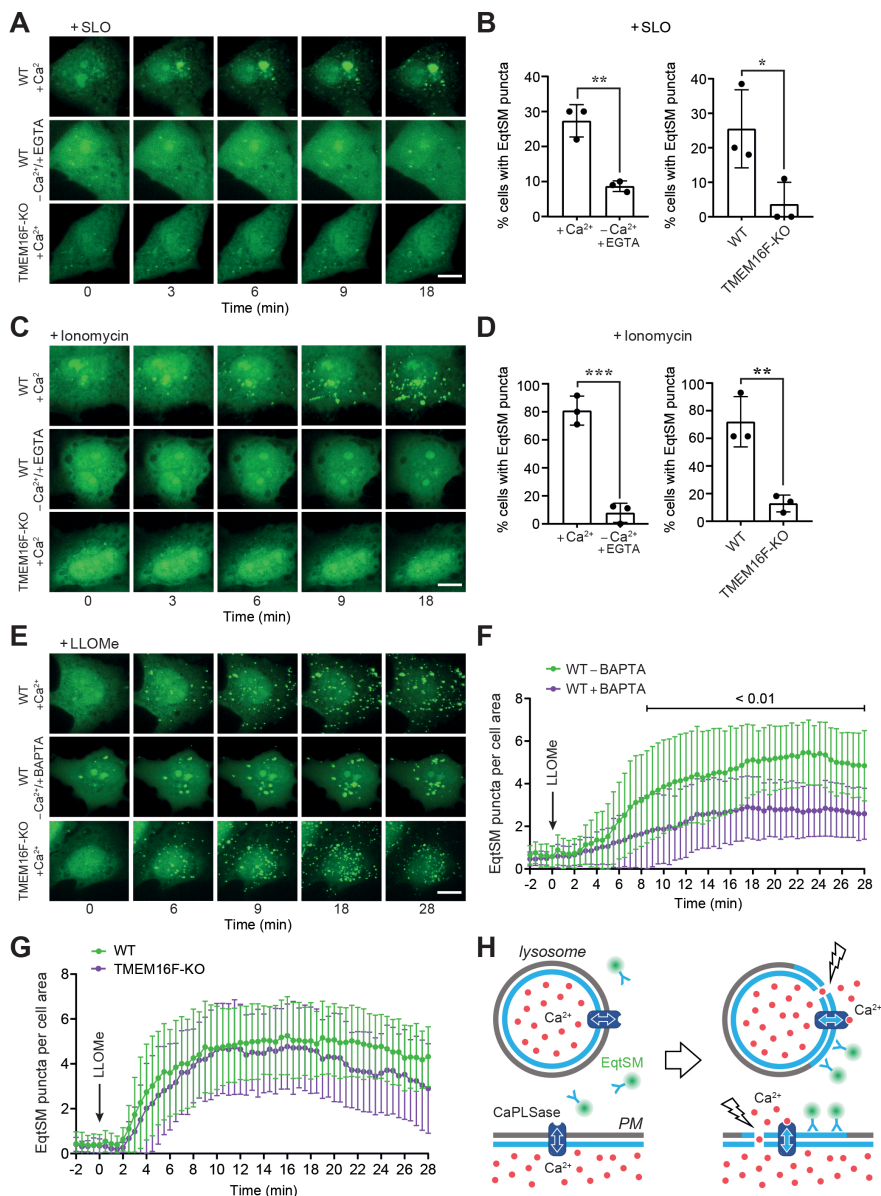

**Fig. 2. Damage-induced SM translocation is mediated by a calcium-activated lipid scramblase.**

(A) Time-lapse fluorescence images of wildtype (WT) or TMEM16F-KO HeLa cells expressing GFP-tagged EqtSM and treated with 1500 U/ml SLO for the indicated time in medium containing (+Ca<sup>2+</sup>) or lacking Ca<sup>2+</sup> (-Ca<sup>2+</sup>/+EGTA). (B) Percentage of cells displaying EqtSM-positive puncta after 30 min of SLO treatment as in (A).

Data are means ± SD from ≥ 24 cells per condition, *n* = 3. \**p* ≤ 0.05 and \*\**p* ≤ 0.01 by unpaired two-tailed t-test.

(C) Time-lapse fluorescence images of wildtype (WT) or TMEM16F-KO HeLa cells expressing GFP-tagged EqtSM and treated with 5 μM ionomycin for the indicated time in medium containing (+Ca<sup>2+</sup>) or lacking Ca<sup>2+</sup> (-Ca<sup>2+</sup>/+EGTA). (D) Percentage of cells displaying EqtSM-positive puncta after 30 min of ionomycin treatment as in (A).

Data are means ± SD from ≥ 24 cells per condition, *n* = 3. \*\**p* ≤ 0.01 and \*\*\**p* ≤ 0.001 by unpaired two-tailed t-test. (E) Time-lapse fluorescence images of wildtype (WT) or TMEM16F-KO HeLa cells expressing GFP-tagged EqtSM treated with 1 mM LLOMe after pre-incubation with or without BAPTA-AM (100 μM, 45 min). Scale bar, 10 μm.

(F) Time-course plotting EqtSM-positive puncta per 100 μm<sup>2</sup> cell area in wildtype (WT) cells treated as in (E). Data are means ± SD from ≥ 21 cells per condition, *n* = 3. Statistical significance was determined by unpaired two-tailed t-test.

(G) Time-course plotting EqtSM-positive puncta per 100 μm<sup>2</sup> cell area in wildtype or TMEM16F-KO HeLa cells treated with LLOMe in the absence of BAPTA-AM as in (F). Data are means ± SD from ≥ 21 cells per condition, *n* = 3.

(H) Schematic illustration of how membrane damage triggers SM scrambling. PM, plasma membrane; CaPLSase, calcium-activated phospholipid scramblase.

704  
705  
706  
707  
708  
709  
710  
711  
712  
713  
714  
715  
716  
717  
718  
719  
720  
721

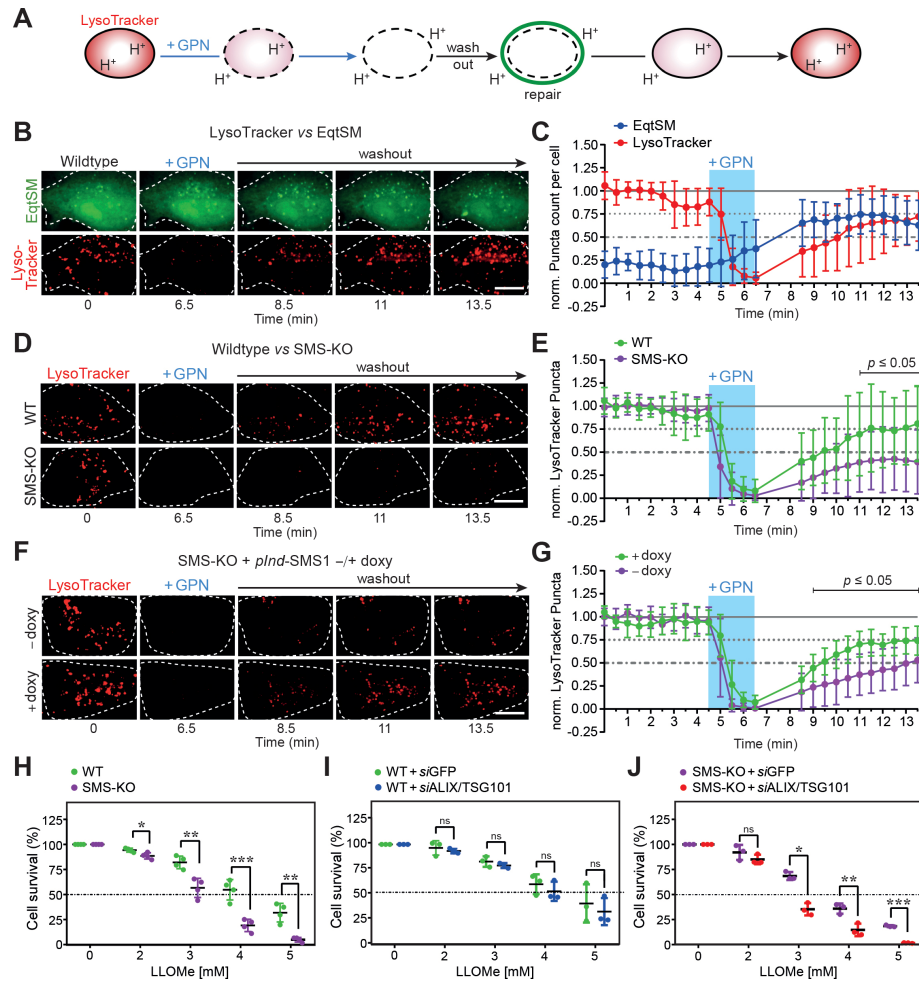

**Fig. 3. SM is critical for recovery of lysosomes from acute damage.**

(A) Schematic outline of lysosomal repair assay. Cells are incubated with LysoTracker to label functional lysosomes. Externally added GPN disrupts the lysosomal membrane, causing a proton efflux and loss of LysoTracker fluorescence. Upon GPN washout, LysoTracker fluorescence gradually recovers, providing a measure for lysosomal repair. (B) Time-lapse fluorescence images of LysoTracker-labeled and EqtSM-expressing HeLa cells during and after a 2 min-pulse of GPN (200  $\mu$ M). Scale bar, 10  $\mu$ m. (C) Time-course plotting LysoTracker- and EqtSM-positive puncta in cells treated as in (B), normalized to the initial number of puncta. Data are means  $\pm$  SD from 18 cells,  $n = 4$ . (D) Time-lapse fluorescence images of LysoTracker-labeled wildtype (WT) and SMS-KO HeLa cells during and after a 2 min-pulse of GPN. Scale bar, 10  $\mu$ m. (E) Time-course plotting LysoTracker-positive puncta in cells treated as in (B), normalized to the initial number of puncta. Data are means  $\pm$  SD from  $\geq 24$  cells per condition,  $n = 4$ . Statistical significance was determined by unpaired two-tailed t-test. (F) Time-lapse fluorescence images of LysoTracker-labeled SMS-KO HeLa cells transduced with doxycycline-inducible SMS1 (*pInd-SMS1*) during and after a 2 min-pulse of GPN following 48 h pre-incubation in the absence (-doxy) or presence of 1  $\mu$ g/ml doxycycline (+doxy). Scale bar, 10  $\mu$ m. (G) Time-course plotting LysoTracker-positive puncta in cells treated as in (D), normalized to the initial number of puncta. Data are means  $\pm$  SD from  $\geq 17$  cells per condition,  $n = 3$ . Statistical significance was determined by unpaired two-tailed t-test. (H) Survival rate of wildtype (WT) and SMS-KO HeLa cells after 5 h exposure to LLOMe at the indicated concentration. Data are means  $\pm$  SD,  $n = 4$ . (I) Survival rate of wildtype (WT) HeLa cells pre-treated with siRNAs targeting GFP or ALIX and TSG101 for 72 h and then exposed for 5 h to LLOMe at the indicated concentration. Data are means  $\pm$  SD,  $n = 3$ . (J) Survival rate of SMS-KO HeLa cells pre-treated with siRNAs targeting GFP or ALIX and TSG101 for 72 h and then exposed for 5 h to LLOMe at the indicated concentration. Data are means  $\pm$  SD,  $n = 3$ . Statistical significance was determined by paired two-tailed t-test.  $p$ -values are presented where significant. \* $p \leq 0.05$ , \*\* $p \leq 0.01$ , \*\*\* $p \leq 0.001$ .

722

723

724

725

726

727

728

729

730

731

732

733

734

735

736

737

738

739

740

741

742

743

744

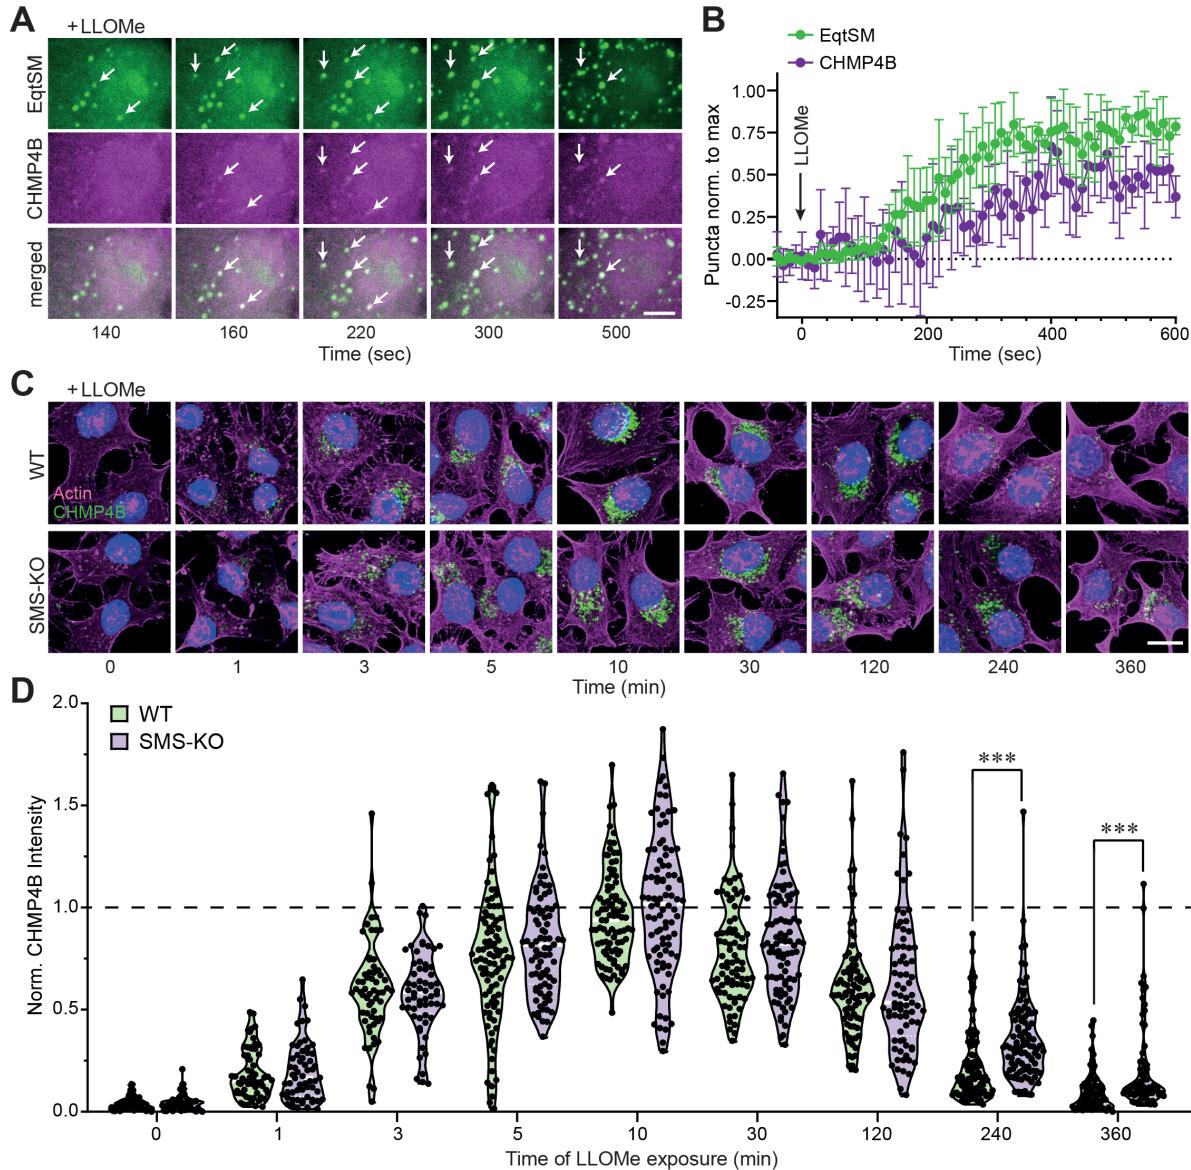

**Fig. 4. SM is dispensable for ESCRT recruitment to damaged lysosomes.**

(A) Time-lapse fluorescence images of wildtype HeLa cells co-expressing mKate-tagged EqtSM (*green*) and eGFP-tagged CHMP4B (*magenta*) and treated with 1 mM LLOMe for the indicated time. White arrows mark EqtSM-positive puncta that gradually accumulate CHMP4B. (B) Time-course plotting EqtSM- and CHMP4B-positive puncta normalized to maximum in cells treated as in (A). Data are means  $\pm$  SD from 5 cells. (C) Fluorescence images of wildtype (WT) and SMS-KO HeLa cells treated with 1 mM LLOMe for the indicated time, fixed, and then stained with DAPI (*blue*) and antibodies against CHMP4B (*green*) and actin (*magenta*). (D) Time-course plotting normalized CHMP4B intensity in cells treated as in (C). More than 30 cells per condition were analyzed,  $n = 2$ . Statistical significance was determined by unpaired two-tailed t-test.  $p$ -values are presented where significant. \*\*\* $p \leq 0.001$ .

745  
746  
747  
748  
749  
750  
751  
752  
753  
754  
755  
756

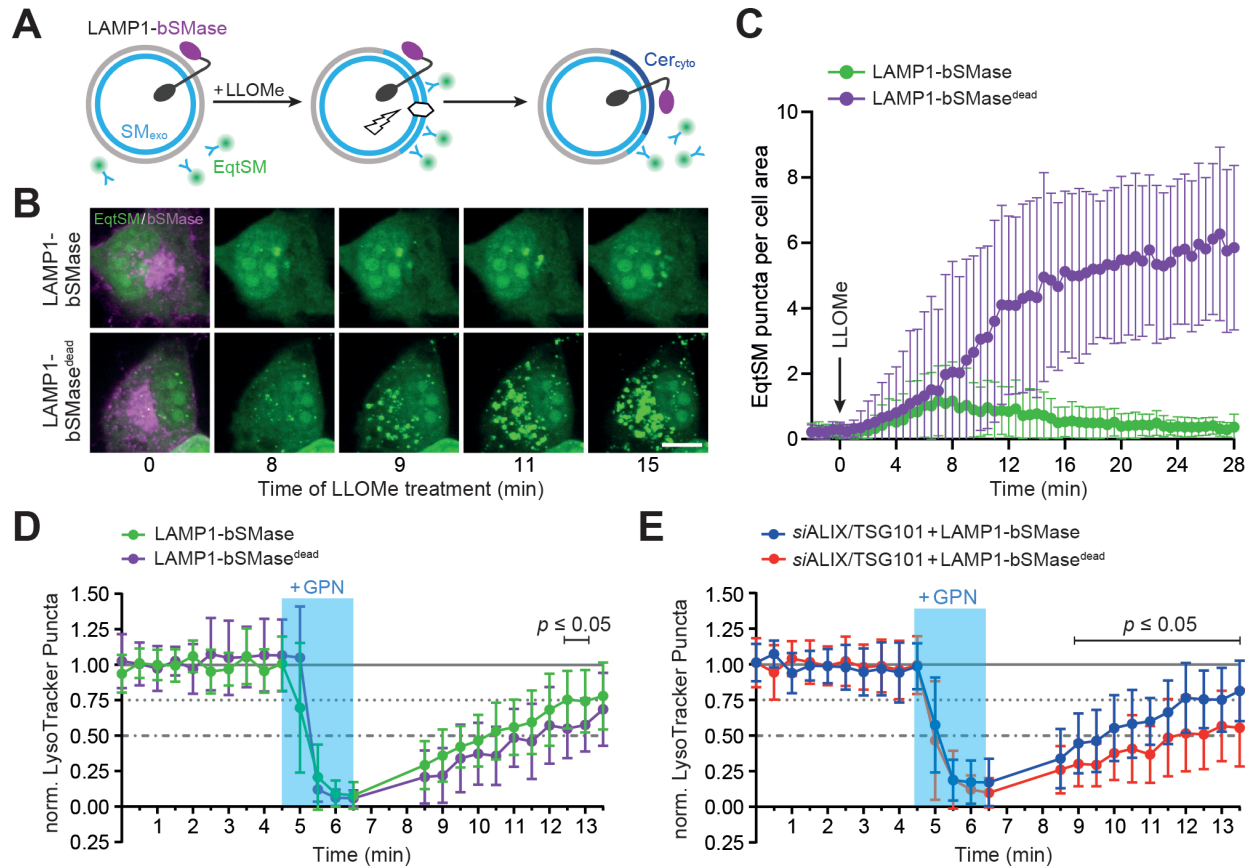

**Fig. 5. Hydrolysis of cytosolic SM promotes lysosomal repair in ESCRT-compromised cells.**

(A) Bacterial SMase (bSMase, *magenta*) was fused to the C-terminus of lysosomal membrane protein LAMP1, enabling an efficient metabolic turn-over of SM translocated to the cytosolic surface of LLOMe-damaged lysosomes. (B) Time-lapse images of HeLa cells co-expressing GFP/V5-tagged LAMP1-bSMase or LAMP1-bSMase<sup>dead</sup> (*magenta*) and mKate-tagged EqtSM (*green*) treated with 1 mM LLOMe for the indicated time. Scale bar, 10 μm. (C) Time-course plotting EqtSM-positive puncta per 100 μm<sup>2</sup> cell area in cells treated as in (B). Data are means ± SD from 14 cells per condition, n = 2. (D) Time-course plotting LysoTracker-positive puncta in HeLa cells co-expressing GFP/V5-tagged LAMP1-bSMase or LAMP1-bSMase<sup>dead</sup> and mKate-tagged EqtSM during and after a 2 min-pulse of GPN, normalized to the initial number of puncta. Data are means ± SD from ≥ 16 cells per condition, n = 3. (E) Time-course plotting LysoTracker-positive puncta in HeLa cells pre-treated with siRNAs targeting GFP or ALIX/TSG101 (72 h) and expressing LAMP1-bSMase or LAMP1-bSMase<sup>dead</sup> during and after a 2 min-pulse of GPN. Data are means ± SD from ≥ 23 cells per condition, n = 3. Statistical significance was determined by unpaired two-tailed t-test.

757  
758  
759  
760  
761  
762  
763  
764  
765  
766  
767  
768  
769  
770  
771  
772

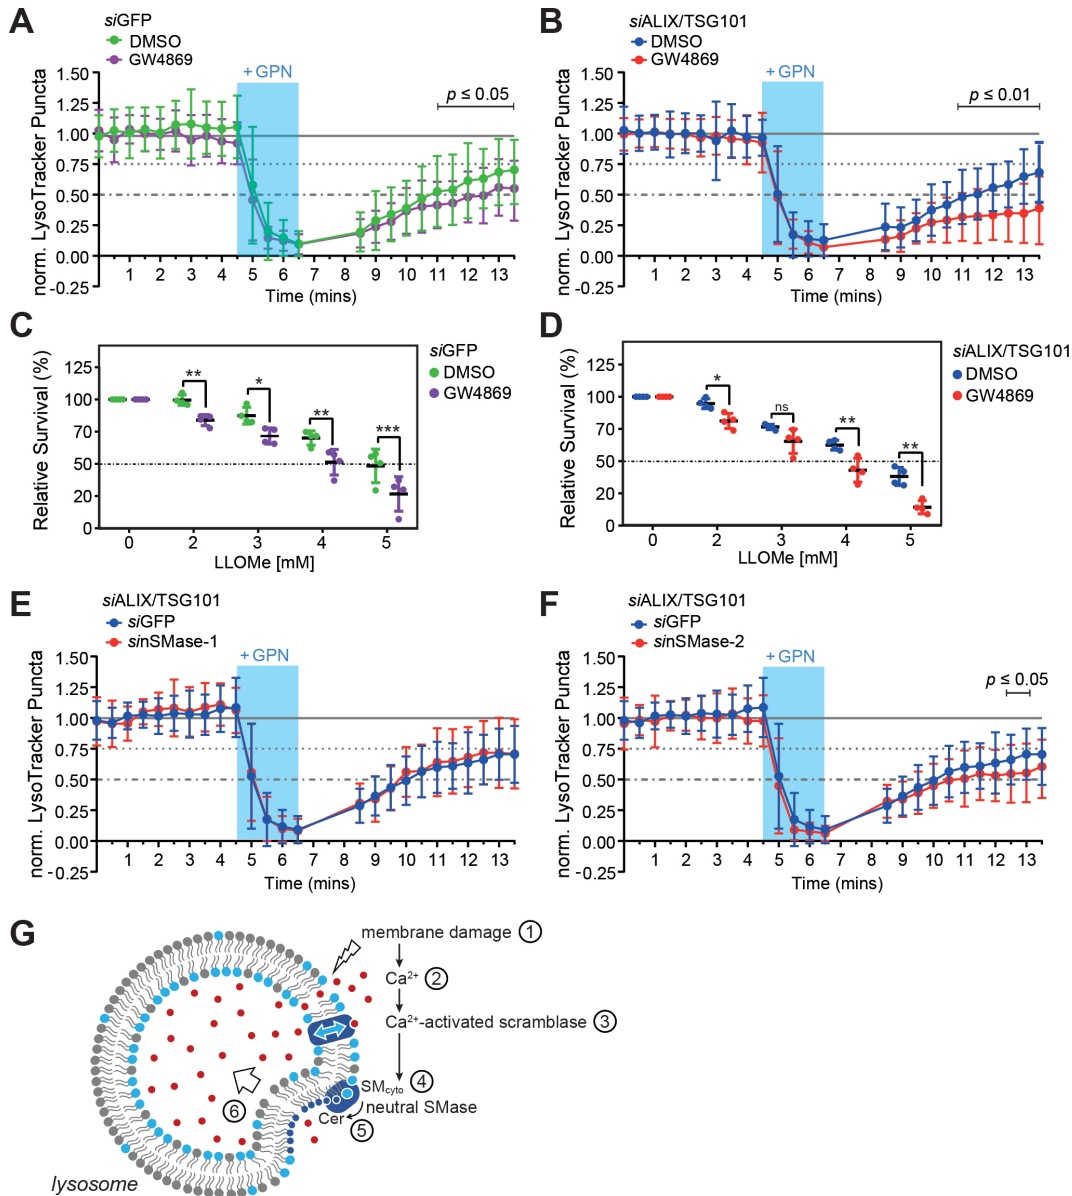

**Fig. 6. Inhibition of neutral SMases disrupts repair of damaged lysosomes.**

(A) Time-course plotting LysoTracker-positive puncta in HeLa cells pre-treated with siRNA targeting GFP (72 h) and 10  $\mu$ M GW4869 or 0.5% (v/v) DMSO as vehicle control (30 min) during and after a 2 min-pulse of GPN. Data are means  $\pm$  SD from  $\geq$  39 cells per condition,  $n = 3$ . (B) Time-course plotting LysoTracker-positive puncta in HeLa cells pre-treated with siRNAs targeting ALIX/TSG101 and 10  $\mu$ M GW4869 or 0.5% (v/v) DMSO (30 min) during and after 2 min-pulse of GPN. Data are means  $\pm$  SD from  $\geq$  44 cells per condition,  $n = 3$ . (C) Survival rate of HeLa cells pre-treated with siRNA targeting GFP (72 h) after 5 h exposure to LLOMe at the indicated concentration in the presence of 10  $\mu$ M GW4869 or 0.5% (v/v) DMSO. Data are means  $\pm$  SD,  $n = 3$ . (D) Survival rate of HeLa cells pre-treated with siRNA targeting ALIX/TSG101 (72 h) after 5 h exposure to LLOMe at the indicated concentration in the presence of 10  $\mu$ M GW4869 or 0.5% (v/v) DMSO. Data are means  $\pm$  SD,  $n = 3$ . (E) Time-course plotting LysoTracker-positive puncta in HeLa cells pre-treated with siRNAs targeting ALIX/TSG101 and GFP or nSMase-1 (72 h) during and after a 2 min-pulse of GPN. Data are means  $\pm$  SD from  $\geq$  28 cells per condition,  $n = 3$ . (F) Time-course plotting LysoTracker-positive puncta in HeLa cells pre-treated with siRNAs targeting ALIX/TSG101 and GFP or nSMase-2 (72 h) during and after a 2 min-pulse of GPN. Data are means  $\pm$  SD from  $\geq$  29 cells per condition,  $n = 3$ . Statistical significance was determined by paired (C,D) or unpaired two-tailed t-test (A,B,E,F).  $p$ -values are presented where significant. \* $p \leq 0.05$ , \*\* $p \leq 0.01$ , \*\*\* $p \leq 0.001$ .

773  
774  
775  
776  
777  
778  
779  
780  
781  
782  
783  
784  
785  
786  
787  
788  
789  
790
